# Supplementary material for: Synthesis of anatase TiO2 nanocrystals with {101}, {001} or {010} single facets of 90% level exposure and liquid-phase photocatalytic reduction and oxidation activity orders
Source: Royal Society of Chemistry journal article supplement (doi:10.1039/c3ta11791j), 2013-01-01
Supplement: c3ta11791j.pdf [file c3ta11791j.pdf]

*Supporting Materials for:*

**Synthesis of anatase TiO<sub>2</sub> nanocrystals with {101}, {001} or {010}  
single facets of 90% level exposure and liquid phase  
photocatalytic reduction and oxidation activity orders**

Liquan Ye,<sup>a,b</sup> Jin Mao,<sup>a</sup> Jinyan Liu,<sup>a</sup> Zhuo Jiang,<sup>a</sup> Tianyou Peng<sup>\*a</sup> and Ling Zan<sup>\*a</sup>

<sup>a</sup> College of Chemistry and Molecular Science, Wuhan University, Wuhan 430072, People's Republic of China, irlab@whu.edu.cn (L. Zan) typeng@whu.edu.cn (T. Peng)

<sup>b</sup> College of Chemistry and Pharmaceutical Engineering, Nanyang Normal University, Nanyang 473061, People's Republic of China

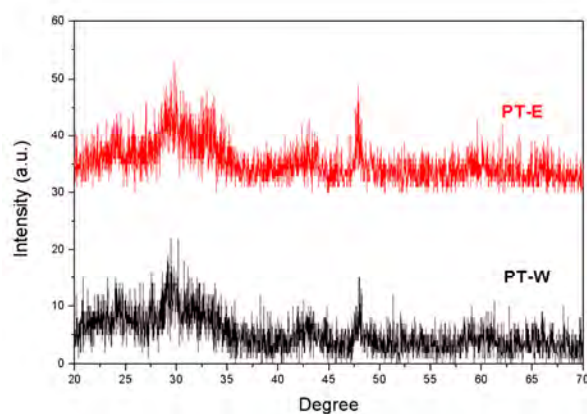

**Fig. S1** XRD patterns of PT-W and PT-E.

Fig. S1 shows the X-ray diffraction patterns (XRD) patterns of PT-W and PT-E. The peaks are indexed to that of K<sub>2</sub>Ti<sub>16</sub>O<sub>13</sub> with the monoclinic structure (JCPDS file No. 00-40-0403, a = 1.559 nm, b = 0.3796 nm and c = 0.9108 nm).

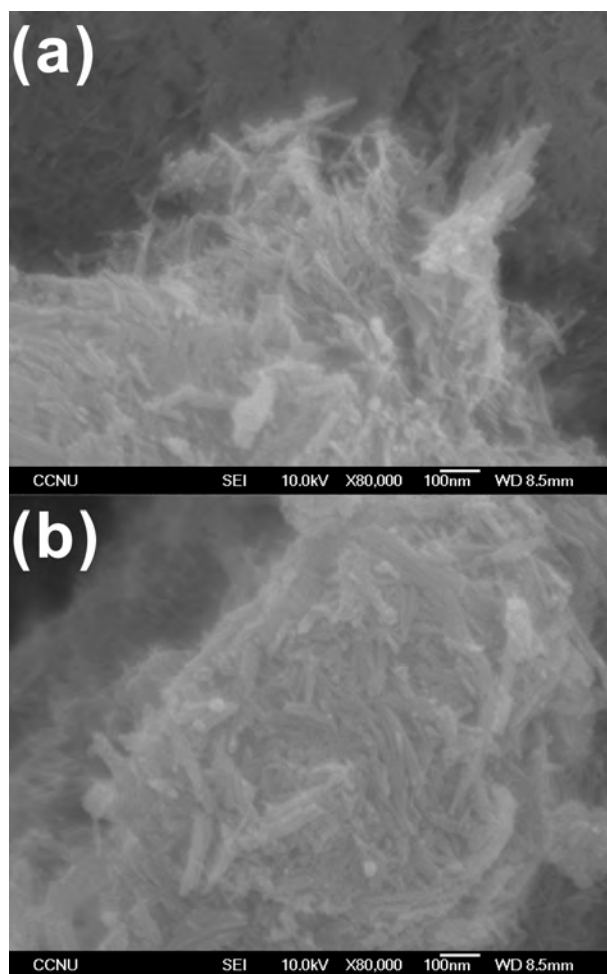

**Fig. S2** FESEM images of PT-E (a) and PT-W (b).

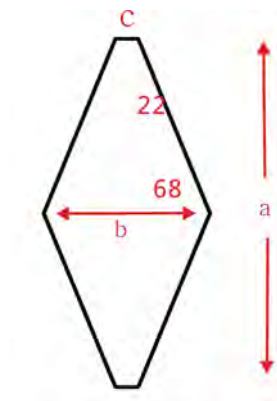

**Fig. S3** Calculation of facets percentage of 101 sample.

$$a = 100 \text{ nm}; b = 60 \text{ nm}$$

$$c = 2 * \tan 22 (25 / \tan 22 - a / 2) = 19.6 \text{ nm}$$

$$S_{101} = 8 [1/2 (b+c) * (a/2) / \cos 22] = 15013 \text{ nm}^2$$

$$S_{001} = 2c^2 = 768 \text{ nm}^2$$

$$\text{Percentage of 101} = 15013 / (15013 + 768) = 95\%$$

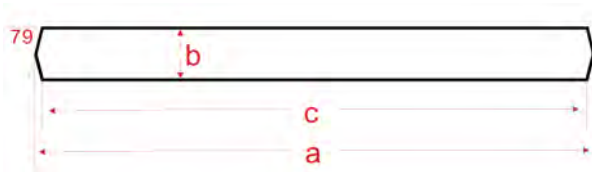

**Fig. S4** Calculation of facets percentage of 001 sample.

$$a = 200 \text{ nm}; b = 10 \text{ nm}$$

$$c = a - 2 * (b/2) / \tan 79 = 198 \text{ nm}$$

$$S_{001} = 2c^2 = 78408 \text{ nm}^2$$

$$S_{201} = 8 * c * (5 / \cos 11) = 8160 \text{ nm}^2$$

$$\text{Percentage of 001} = 78408 / (78408 + 8160) = 91\%$$

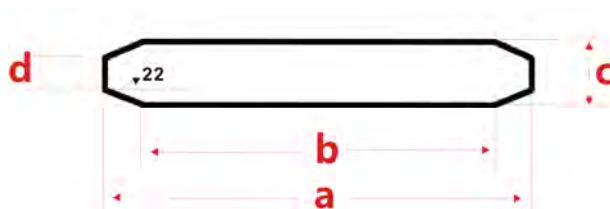

**Fig. S5** Calculation of facets percentage of 010 sample.

$$a = 500 \text{ nm}; b = 50 \text{ nm}; c = 450$$

$$d = b - (a - c) \tan 22 = 30 \text{ nm}$$

$$S_{001} = 2d^2 = 1800 \text{ nm}^2$$

$$S_{101} = 8 [1/2(b+c) * ((a-c)/2)] / \cos 22 = 8000 \text{ nm}^2$$

$$S_{010} = 4bc = 90000 \text{ nm}^2$$

$$\text{Percentage of 010} = 90000 / (90000 + 8000 + 1800) = 90\%$$

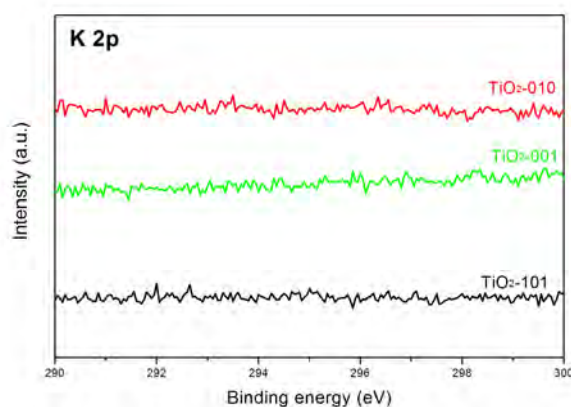

**Fig. S6** K 2p XPS spectra of TiO<sub>2</sub>-101, TiO<sub>2</sub>-001 and TiO<sub>2</sub>-010.

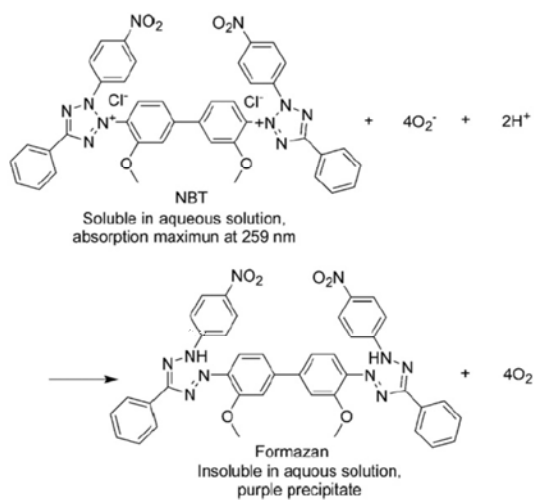

**Fig. S7** Reaction of NBT with superoxide ion.

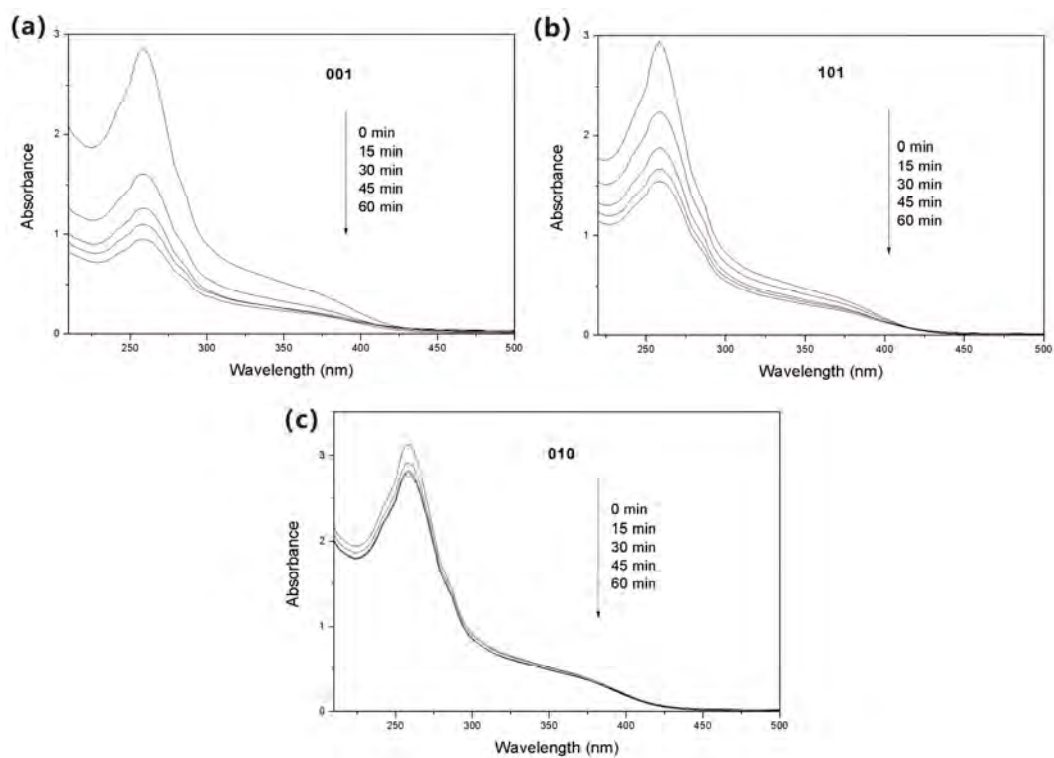

**Fig. S8** UV-Vis absorption spectra of NBT in  $TiO_2$  suspension.

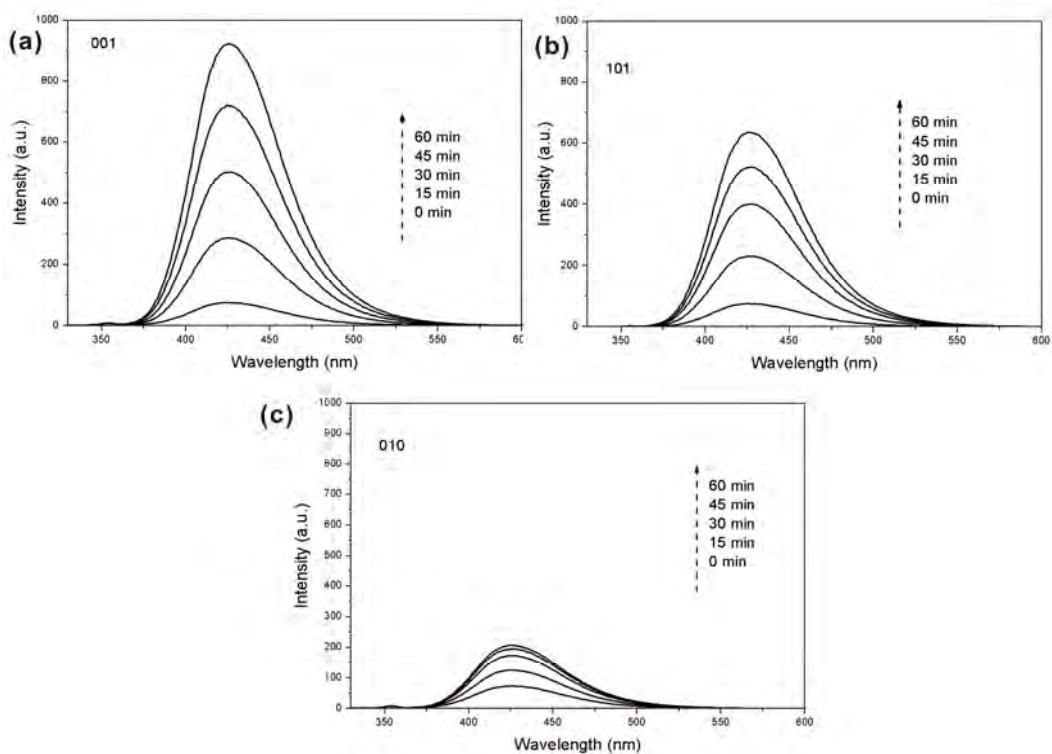

**Fig. S9** PL spectra of TAOH in TiO<sub>2</sub> suspension.

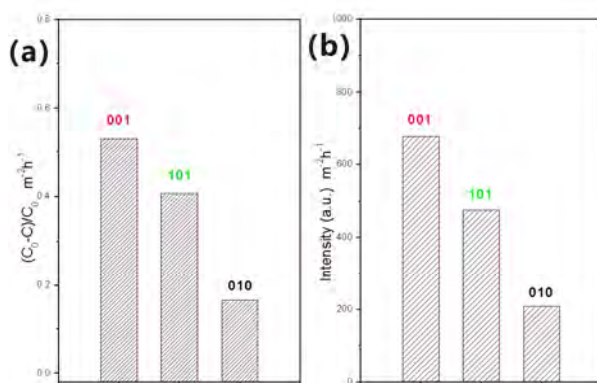

**Fig. S10** Photocatalytic (a) reduction and (b) oxidation activity orders upon normalization by the surface area.

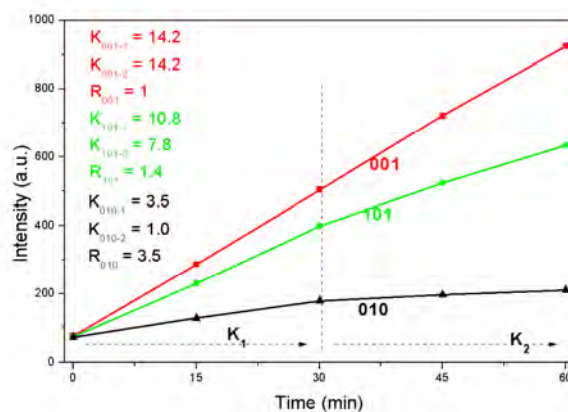

**Fig. S11.** Reaction constant  $K$  and ratio  $R$  between  $K_1$  and  $K_2$  of TAOH in  $\text{TiO}_2$  suspension.

The results of fluorescence emission spectra of  $\text{TiO}_2$  samples with different irradiation times are shown in Figure S9 and Figure S10. Obviously, the linear relationship between the fluorescence intensity and irradiation time during 60 min was observed for  $\text{TiO}_2$ -001, while the increment rate decreased after 30 min irradiation for  $\text{TiO}_2$ -101 and  $\text{TiO}_2$ -010. And the reaction constant  $K$  can be divided into  $K_1$  (0-30 min) and  $K_2$  (30-60 min). The ratio  $R$  between  $K_1$  and  $K_2$  can be used to estimate the separate efficiency of photoexcited holes and electrons.<sup>[12]</sup> It can be seen that the  $R_{001} = 1$ ,  $R_{101} = 1.4$  and  $R_{010} = 3.5$ . This result demonstrated that the order of separate efficiency of photoexcited holes and electrons also is  $\{001\} > \{101\} > \{010\}$ .

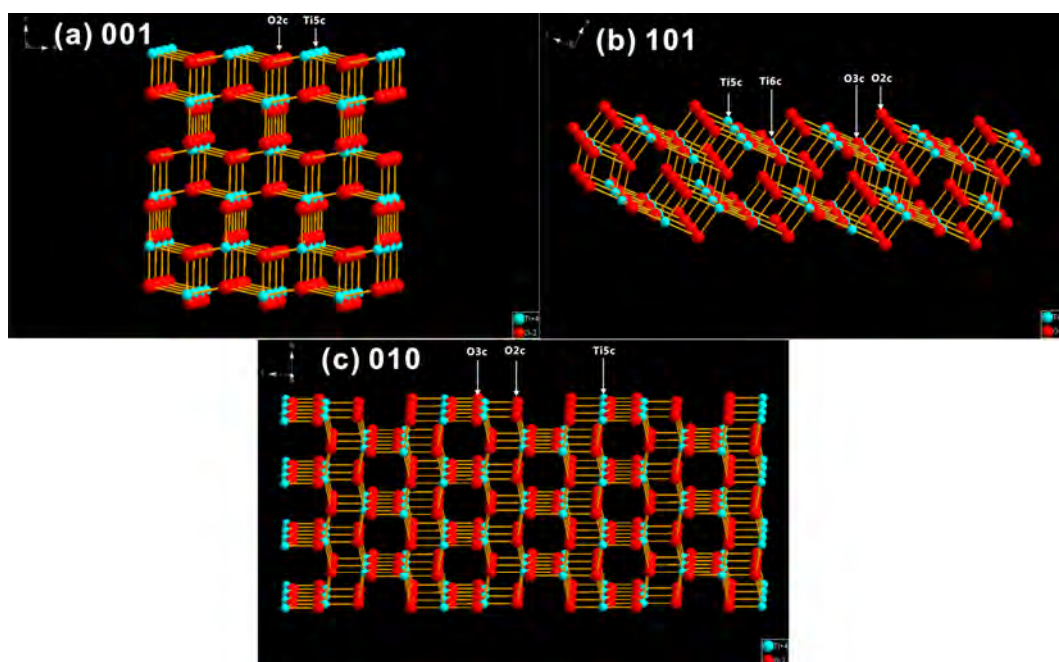

**Fig. S12** Surface atomic structure of {001}, {101} and {010} facets.
